# Supplementary material
Source: PubMed Central journal article supplement (PMC5769565)
Supplement: jexbio-220-167031-s1.pdf [file jexbio-220-167031-s1.pdf]

## **Table S1**

[Click here to Download Table S1](#)
